# Supplementary material for: Environmental Contamination of SARS-CoV-2 in a Non-Healthcare Setting
Source: MDPI journal article supplement (doi:10.3390/ijerph18010117), 2020-12-26
Supplement: s1 [file s1]

**Table 1.** Sensitivity of different PCR assays for the detection of SARS-CoV-2.

| RNA copies | Assay       |               |                 |                         |
|------------|-------------|---------------|-----------------|-------------------------|
|            | HKU-N assay | HKU-ORF assay | China CDC assay | Conventional nested PCR |
| 100000     | 26.33       | 28.18         | 21.94           | Positive                |
| 5000       | 31.31       | 33.11         | 26.59           | Positive                |
| 250        | 35.77       | 36.99         | 31.45           | Positive                |
| 12.5       | Negative    | Negative      | 36.03           | Positive                |
| 0.6        | Negative    | Negative      | Negative        | Negative                |

Hong Kong University (HKU) assays target the nucleocapsid protein (screening assay) and Open Reading Frame (ORF) 1b. China CDC assay targets ORF 1ab. All real-time PCR assays were evaluated by using the Luna Universal qPCR Master Mix (New England Biolabs, USA), according to the protocols recommended by the developers of respective assays. The conventional nested PCR assay targets the RNA dependent RNA polymerase gene. All assay evaluations were done using 2  $\mu$ L of template dilutions. The dilutions were obtained from a synthetic RNA control of SARS-CoV-2 with known copy numbers (1+E6 copies per  $\mu$ L; Twist Bioscience, USA). The detection threshold for all real-time PCR assays was Cq < 40.

**Table S2.** The details and list of authors of the sequences retrieved from GISAID's EpiCoV database

| Accession ID   | Virus name               | Location         | Collection date | Originating lab                                                         | Submitting lab                                                     | Authors                                                                                                                                                            |
|----------------|--------------------------|------------------|-----------------|-------------------------------------------------------------------------|--------------------------------------------------------------------|--------------------------------------------------------------------------------------------------------------------------------------------------------------------|
| EPI_ISL_410537 | hCoV-19/Singapore/6/2020 | Asia / Singapore | 2020-02-09      | Singapore General Hospital, Molecular Laboratory, Division of Pathology | Programme in Emerging Infectious Diseases, Duke-NUS Medical School | Danielle E Anderson, Martin Linster, Yan Zhuang, Jayanthi Jayakumar, Kian Sing Chan, Lynette LE Oon, Shirin Kalimuddin, Jenny GH Low, Yvonne CF Su, Gavin JD Smith |
| EPI_ISL_410536 | hCoV-19/Singapore/5/2020 | Asia / Singapore | 2020-02-06      | Singapore General Hospital, Molecular Laboratory, Division of Pathology | Programme in Emerging Infectious Diseases, Duke-NUS Medical School | Danielle E Anderson, Martin Linster, Yan Zhuang, Jayanthi Jayakumar, Kian Sing Chan, Lynette LE Oon, Shirin Kalimuddin, Jenny GH Low, Yvonne CF Su, Gavin JD Smith |
| EPI_ISL_406973 | hCoV-19/Singapore/1/2020 | Asia / Singapore | 2020-01-23      | Singapore General Hospital                                              | National Public Health Laboratory                                  | Mak, TM; Octavia S; Chavatte JM; Zhou, ZY; Cui, L; Lin, RTP                                                                                                        |
